# Supplementary material for: Antimony Removal from Water by a Chitosan-Iron(III)[ChiFer(III)] Biocomposite
Source: MDPI journal article supplement (doi:10.3390/polym11020351), 2019-02-18
Supplement: s1 [file s1]

### Supplementary Materials

Figure S1. FTIR spectra of neat chitosan - CS

Figure S2. FTIR spectra of ChiFer(III) before Sb(III) adsorption

Figure S3. FTIR spectra of ChiFer(III) after Sb(III) adsorption

Figure S4. ChiFer(III) beads at the time=0

Figure S5. ChiFer(III) beads at the time=24 h

Figure S6. ChiFer(III) beads at the time=48 h

Figure S7. Particle size of ChiFer(III) material

Figure S1. FTIR spectra of neat chitosan - CS

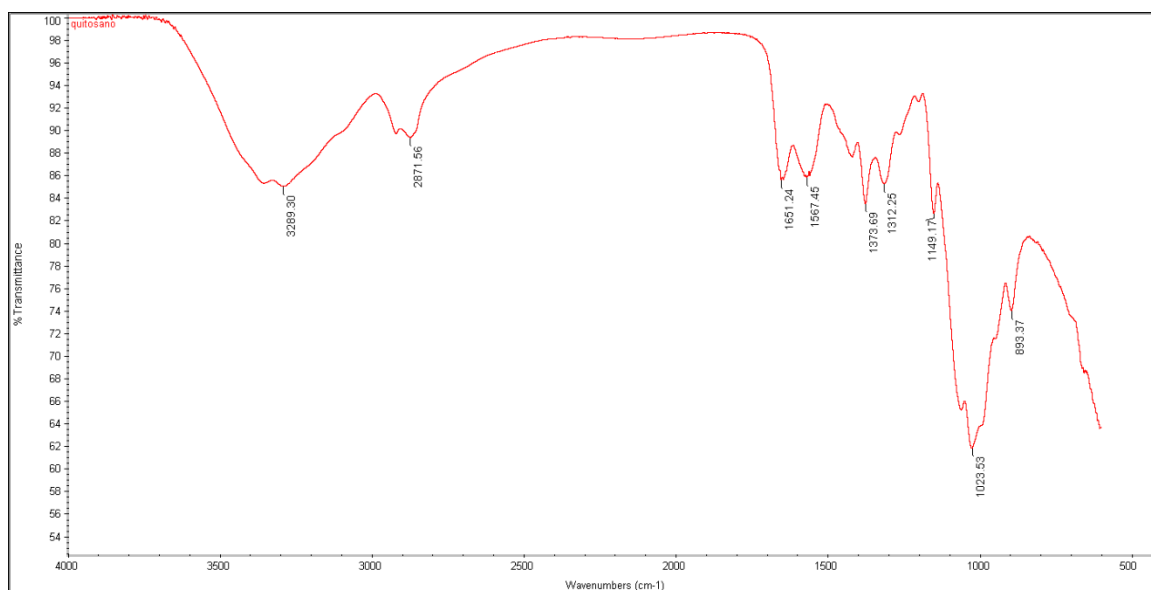

Figure S2. FTIR spectra of ChiFer(III) before Sb(III) adsorption

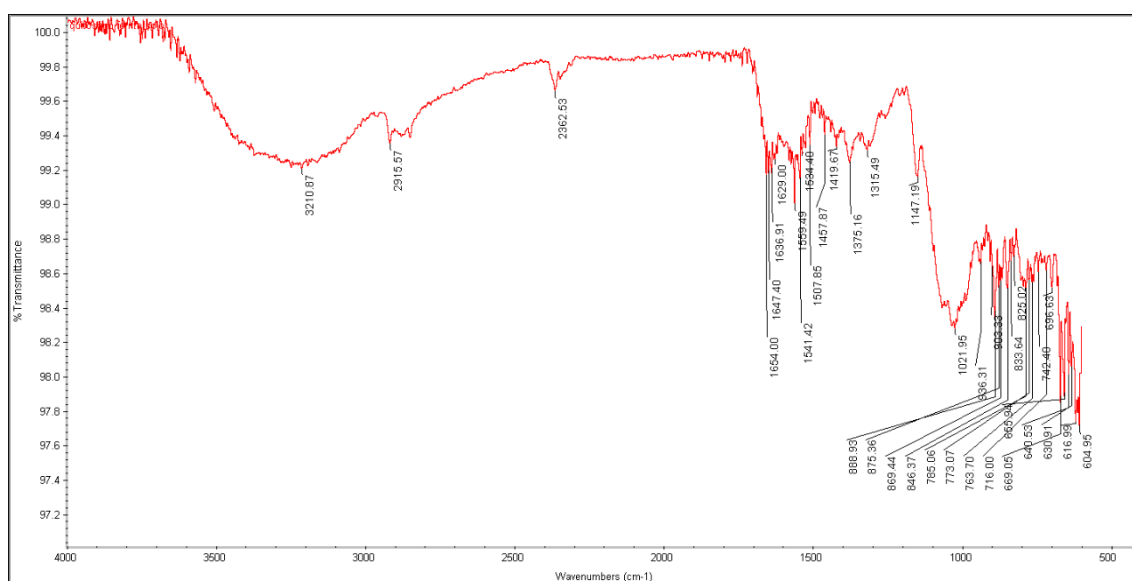

Figure S3. FTIR spectra of ChiFer(III) after Sb(III) adsorption

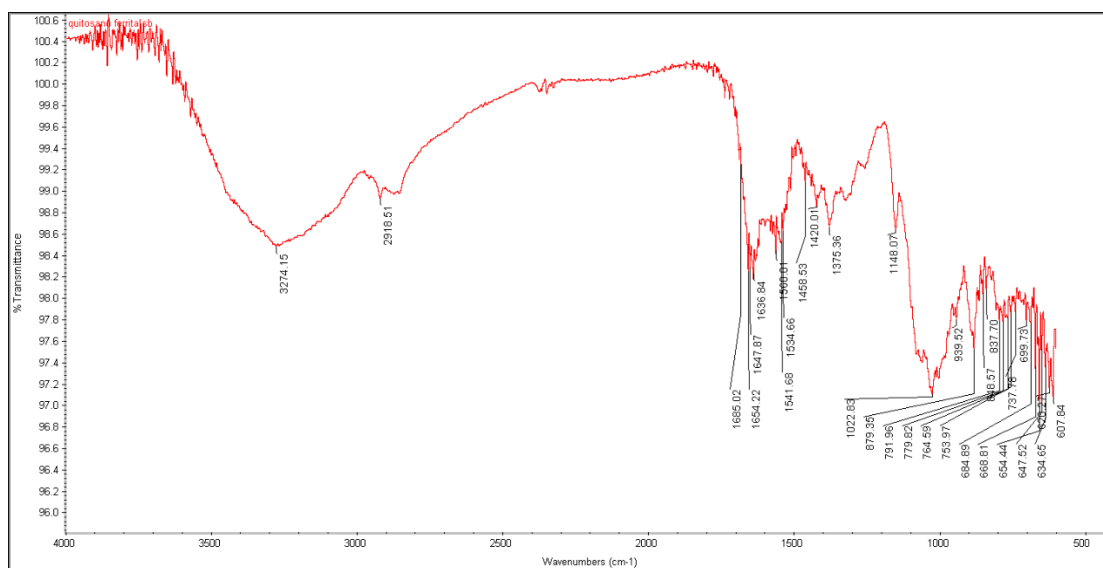

#### ESTABILITY OF THE ChiFer(III) material

Figure S4. ChiFer(III) beads at the time=0

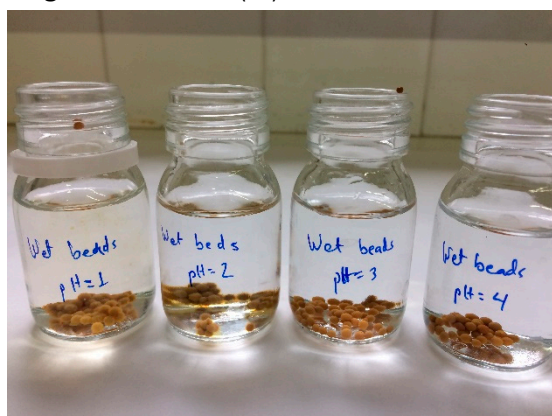

Figure S5. ChiFer(III) beads at the time=24 h

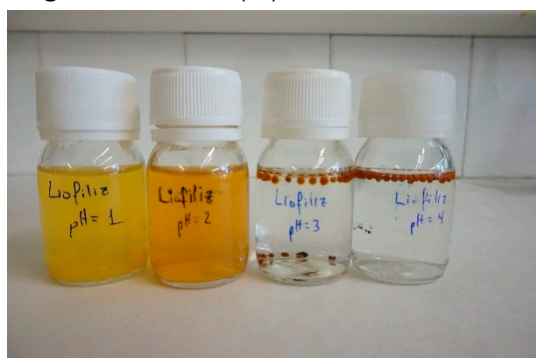

Figure S6. ChiFer(III) beads at the time=48 h

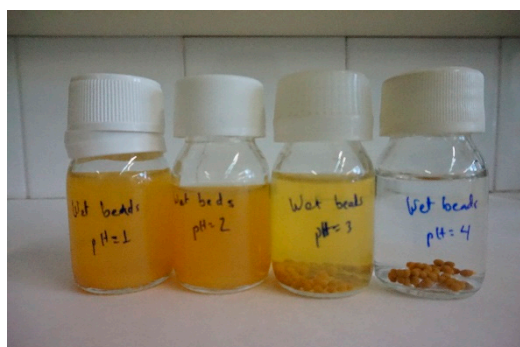

Figure S7. Particle size of ChiFer(III) material

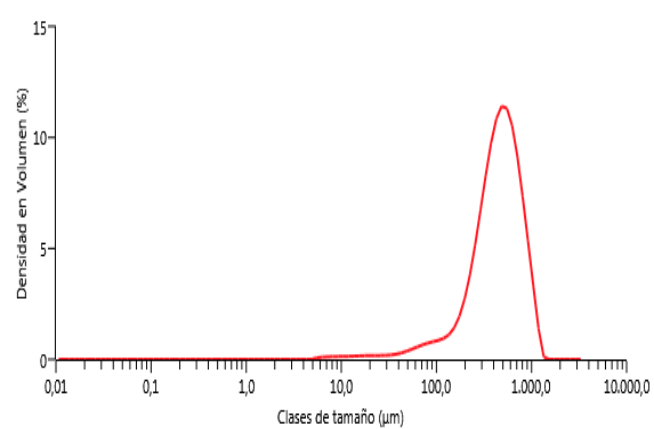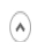

[37] chitosan particles-22/12/2017 1
